# Supplementary material for: A Spontaneous In Situ Thiol-Ene Crosslinking Hydrogel with Thermo-Responsive Mechanical Properties
Source: MDPI journal article supplement (doi:10.3390/polym16091264), 2024-05-01
Supplement: s1 [file s1]

## Supporting information:

# A Spontaneous In Situ Thiol-Ene Crosslinking Hydrogel with Thermo-Responsive Mechanical Properties

Andreas Aerts <sup>1</sup>, Maxim Vovchenko <sup>2,3</sup>, Seyed Ali Elahi <sup>2,4</sup>, Rocío Castro Viñuelas <sup>4,5</sup>, Tess De Maeseneer <sup>6</sup>, Martin Purino <sup>7</sup>, Richard Hoogenboom <sup>7</sup>, Hans Van Oosterwyck <sup>2,8</sup>, Ilse Jonkers <sup>4</sup>, Ruth Cardinaels <sup>6</sup> and Mario Smet <sup>1,\*</sup>

<sup>1</sup> Laboratory of Organic Material Synthesis, Polymer Chemistry and Materials, Department of Chemistry, KU Leuven, Celestijnenlaan 200f, P.O. Box 2404, 3001 Leuven, Belgium; andreas.aerts@kuleuven.be (A.A.)

<sup>2</sup> Biomechanics Section, Department of Mechanical Engineering, KU Leuven, Celestijnenlaan 300C, P.O. Box 2419, 3001 Leuven, Belgium.

<sup>3</sup> Laboratory for Soft Matter and Biophysics, Department of Physics and Astronomy, KU Leuven, Celestijnenlaan 200D, P.O. Box 2416, 3001 Leuven, Belgium

<sup>4</sup> Human Movement Biomechanics Research Group, Department of Movement Sciences, KU Leuven Tervuursevest 101, P.O. Box 1501, 3001 Leuven, Belgium.

<sup>5</sup> Laboratory for Tissue Homeostasis and Disease, Department of Development and Regeneration, KU Leuven, Herestraat 49, P.O. Box 813, 3000 Leuven, Belgium

<sup>6</sup> Rheology and Technology, Soft Matter, Department of Chemical Engineering, KU Leuven, Celestijnenlaan 200J, P.O. Box 2424, 3001 Leuven, Belgium;

<sup>7</sup> Supramolecular Chemistry Group, Department of Organic and Macromolecular Chemistry, UGent, Krijgslaan 281, Building S4, 9000 Ghent, Belgium;

<sup>8</sup> Prometheus, Division of Skeletal Tissue Engineering, KU Leuven, Herestraat 49, P.O. Box 813, 3000 Leuven, Belgium

\* Correspondence: mario.smet@kuleuven.be

# <sup>1</sup>H NMR spectroscopy

## P(NiPAAM-co-HEAcr)

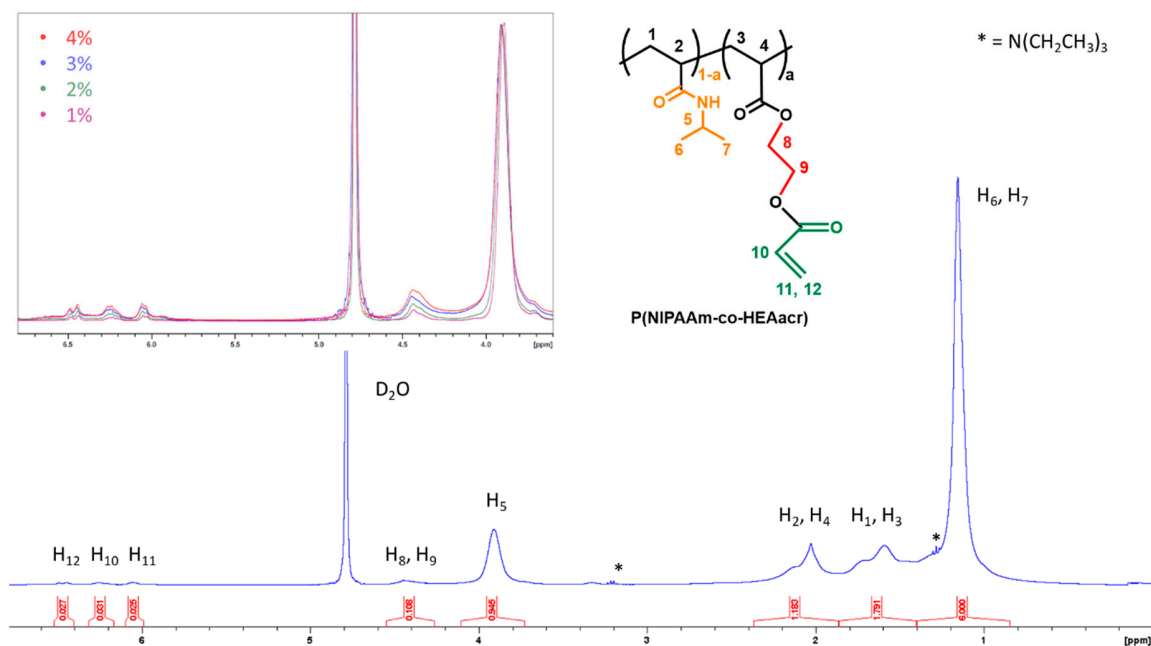

Fig. S1: Spectra of HEAcr: inset represents different incorporation ratio. Normalized to peak 3.91 ppm.

## DIFFERENT RATIOS HEAcr

| $\delta(\text{ppm})$ | Proton           | # protons | Intensity<br>HEAcr1 | Intensity<br>HEAcr2 | Intensity<br>HEAcr3 | Intensity<br>HEAcr4 |
|----------------------|------------------|-----------|---------------------|---------------------|---------------------|---------------------|
| 6.46                 | H <sub>12</sub>  | 1         | 0.007               | 0.019               | 0.027               | 0.030               |
| 6.24                 | H <sub>10</sub>  | 1         | 0.006               | 0.019               | 0.031               | 0.039               |
| 6.05                 | H <sub>11</sub>  | 1         | 0.007               | 0.017               | 0.025               | 0.030               |
| 4.79                 | D <sub>2</sub> O | /         | /                   | /                   | /                   | /                   |

|      |                                 |   |       |       |       |       |
|------|---------------------------------|---|-------|-------|-------|-------|
| 4.40 | H <sub>8</sub> , H <sub>9</sub> | 4 | 0.035 | 0.072 | 0.108 | 0.154 |
| 3.91 | H <sub>5</sub>                  | 1 | 1.000 | 1.000 | 1.000 | 1.000 |
| 2.12 | H <sub>2</sub> , H <sub>4</sub> | 2 | 1.108 | 1.137 | 1.183 | 1.397 |
| 1.63 | H <sub>1</sub> , H <sub>3</sub> | 4 | 1.864 | 1.814 | 1.791 | 1.800 |
| 1.13 | H <sub>6</sub> , H <sub>7</sub> | 6 | 5.922 | 5.82  | 5.682 | 5.688 |

Table S1: Overview intensities measured in NMR spectra P(NiPAAm-co-HEAacr)

$$\frac{HEA}{NIPAAm} = \frac{I(H_8, H_9)}{4} \quad e.g. (HEAacr3) = \frac{0.108}{4} = 2.7 \%$$

$$\frac{HEAacr}{NIPAAm} = \frac{I(H_{10}, H_{11}, H_{12})}{4}$$

$$e.g. (HEAacr3) = \frac{0.025 + 0.031 + 0.027}{3} = 2.7 \%$$

| <i>Name</i> | <i>Feed</i> | <i>Measured<br/>HEA (NMR)</i> | <i>Measured<br/>HEAacr (NMR)</i> |
|-------------|-------------|-------------------------------|----------------------------------|
| HEAacr 1%   | 1 %         | 0.88 %                        | 0.67 %                           |
| HEAacr 2%   | 2 %         | 1.8 %                         | 1.8 %                            |
| HEAacr 3%   | 3 %         | 2.7 %                         | 2.7 %                            |
| HEAacr 4%   | 4 %         | 3.8 %                         | 3.3 %                            |

Table S2: Obtained incorporation ratios from NMR spectra for P(NiPAAm-co-HEAacr)

P(NiPAAm-co-cys)

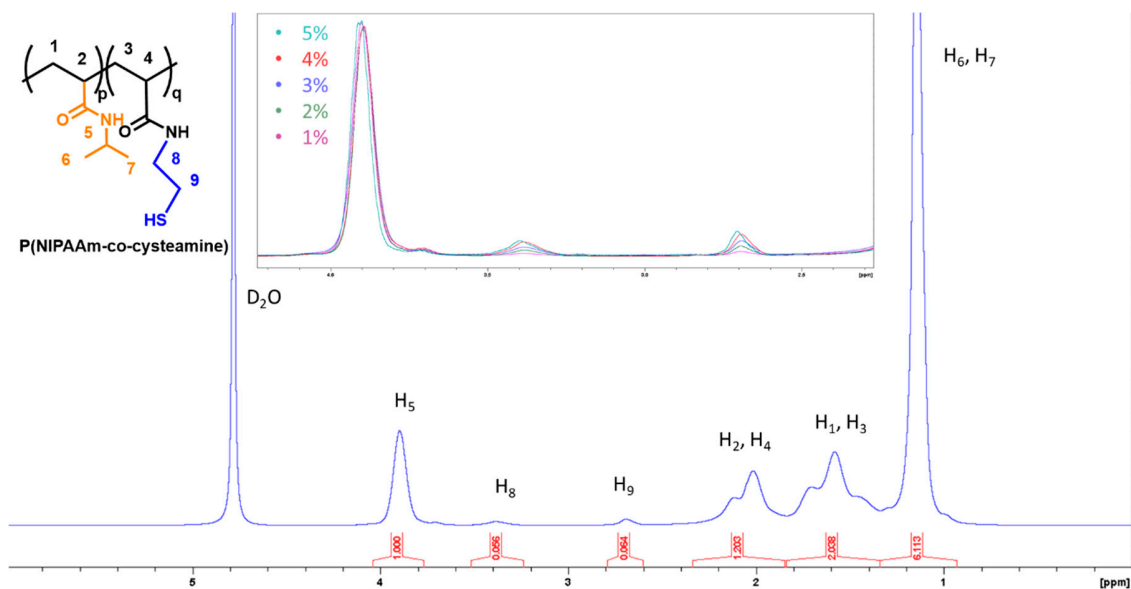

Fig.S2: Spectra of Cys3; inset represents different incorporation ratio. Normalized to peak 3.91 ppm.

| $\delta(\text{ppm})$ | Proton                          | # protons | Intensity Cys 1 | Intensity Cys 2 | Intensity Cys 3 | Intensity Cys 4 | Intensity Cys 5 |
|----------------------|---------------------------------|-----------|-----------------|-----------------|-----------------|-----------------|-----------------|
| 4.79                 | D <sub>2</sub> O                |           | /               | /               | /               | /               | /               |
| 3.90                 | H <sub>5</sub>                  | 1         | 1.000           | 1.000           | 1.000           | 1.000           | 1.000           |
| 3.39                 | H <sub>8</sub>                  | 2         | 0.017           | 0.035           | 0.056           | 0.076           | 0.095           |
| 2.69                 | H <sub>9</sub>                  | 2         | 0.021           | 0.039           | 0.064           | 0.078           | 0.091           |
| 2.10                 | H <sub>2</sub> , H <sub>4</sub> | 2         | 1.131           | 1.193           | 1.203           | 1.235           | 1.126           |
| 1.60                 | H <sub>1</sub> , H <sub>3</sub> | 4         | 1.909           | 1.875           | 2.038           | 1.880           | 1.977           |
| 1.14                 | H <sub>6</sub> , H <sub>7</sub> | 6         | 6.024           | 6.091           | 5.988           | 6.192           | 6.000           |

Table S3: Overview intensities measured in NMR spectra P(NiPAAm-co-Cys)

$$\frac{\text{Cys}}{\text{NiPAAm}} = \frac{I(\text{H}_8, \text{H}_9)}{4} \quad e.g. \quad (\text{Cys3}) = \frac{0.056 + 0.064}{4} = 3.0 \%$$

| <i>Name</i> | <i>Feed</i> | <i>Measured (NMR)</i> |
|-------------|-------------|-----------------------|
| Cys 1%      | 1 %         | 0.95 %                |
| Cys 2%      | 2 %         | 1.85 %                |
| Cys 3%      | 3 %         | 3.00 %                |
| Cys 4%      | 4 %         | 3.85 %                |
| Cys 5%      | 5%          | 4.65 %                |

Table S4: Obtained incorporation ratios from NMR spectra for P(NiPAAm-co-Cys)

#### ELLMAN'S METHOD

| <i>Name</i> | <i>Concentration solution (mmol/L)</i> | <i>Absorbance (A)</i> | <i>Percentage free thiols</i> | <i>Conversion</i> |
|-------------|----------------------------------------|-----------------------|-------------------------------|-------------------|
| <b>CYS1</b> | 7.35                                   | 0.774                 | 0.74%                         | 74%               |
| <b>CYS2</b> | 2.77                                   | 0.690                 | 1.76%                         | 88%               |
| <b>CYS3</b> | 7.33                                   | 2.74                  | 2.64%                         | 88%               |
| <b>CYS4</b> | 3.41                                   | 1.88                  | 3.89%                         | 97%               |
| <b>CYS5</b> | 7.31                                   | 4.36                  | 4.22%                         | 84%               |

Table S5: : Obtained incorporation ratios from Ellman's method for P(NiPAAm-co-Cys)

$$\text{molar absorption coefficient } (\varepsilon) = 14\,150\, M^{-1}cm^{-1}$$

$$\text{Percentage free thiols} = \frac{\text{Absorbance (A)}}{\frac{\text{molar absorption coefficient } (\varepsilon)}{\text{concentration solution}}}$$

$$\text{Conversion} = \frac{\text{Percentage free thiols}}{\text{feed ratio}}$$

## FTIR SPECTROSCOPY

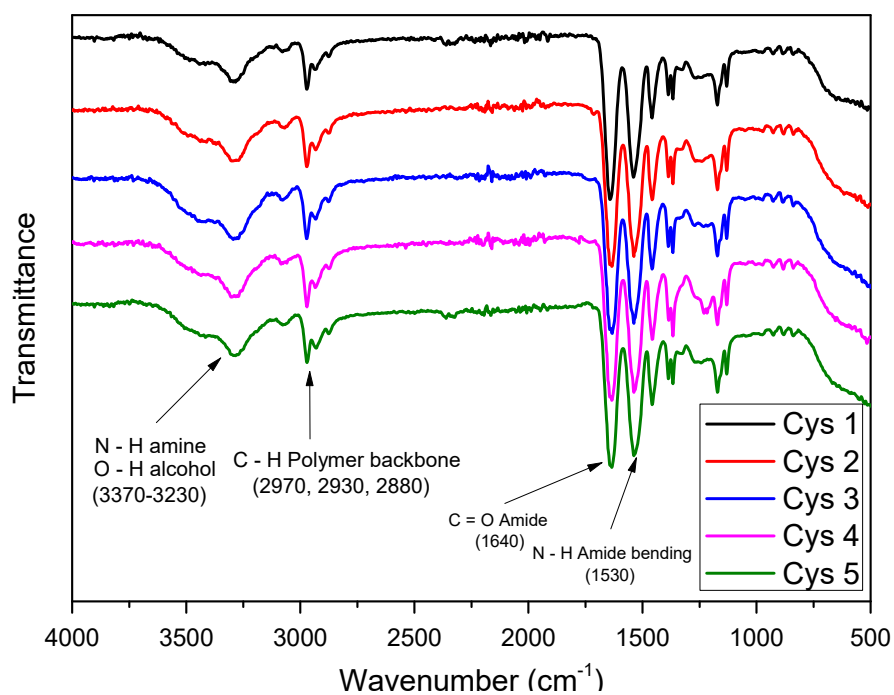

Fig.S3: FITR of Cys with different incorporation ratio and annotated peaks.

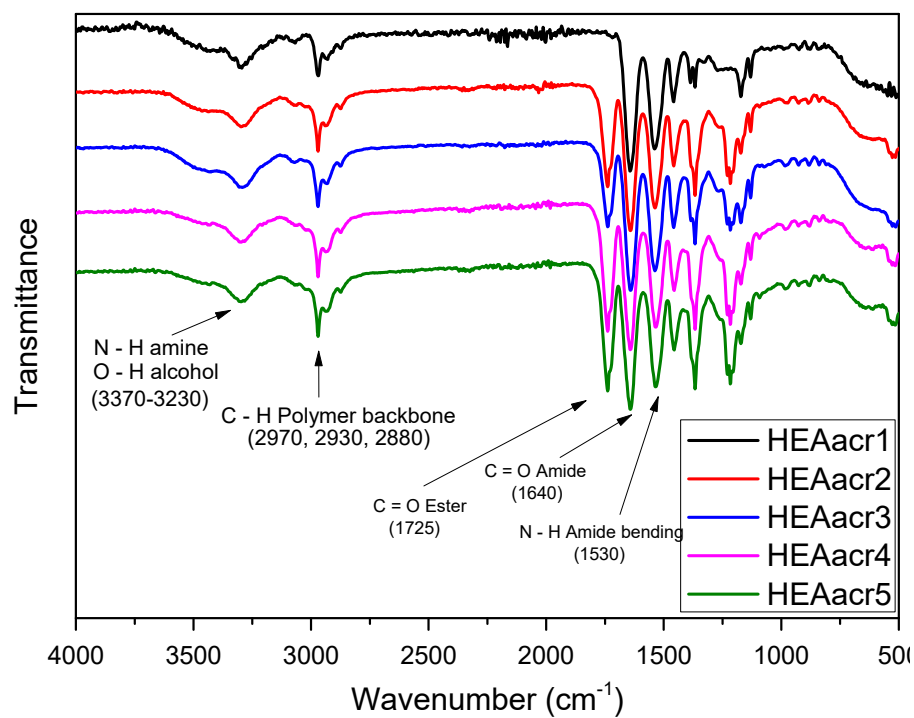

Fig.S4: FTIR of HEAacr with different incorporation ratio and annotated peaks.

| Cold 4 °C |                             |                           |                             |                                | Hot 45 °C                   |                           |                             |                                |
|-----------|-----------------------------|---------------------------|-----------------------------|--------------------------------|-----------------------------|---------------------------|-----------------------------|--------------------------------|
| Name      | Storage modulus<br>G' (kPa) | Loss modulus<br>G'' (kPa) | Complex modulus<br>G* (kPa) | Loss factor<br>tan( $\delta$ ) | Storage modulus<br>G' (kPa) | Loss modulus<br>G'' (kPa) | Complex modulus<br>G* (kPa) | Loss factor<br>tan( $\delta$ ) |
| Hydr 1%   | 0.33 ± 0.08                 | 0.056 ± 0.002             | 0.34 ± 0.08                 | 0.17 ± 0.04                    | 10.1 ± 1.6                  | 14.7 ± 2.8                | 18.8 ± 2.9                  | 1.45 ± 0.23                    |
| Hydr 2%   | 6.55 ± 0.59                 | 0.442 ± 0.163             | 6.56 ± 0.59                 | 0.068 ± 0.03                   | 29.7 ± 5.5                  | 34.7 ± 6.6                | 45.7 ± 8.6                  | 1.17 ± 0.01                    |
| Hydr 3%   | 11.0 ± 2.7                  | 0.269 ± 0.129             | 11.0 ± 2.7                  | 0.025 ± 0.01                   | 44.3 ± 11.9                 | 31.5 ± 9.9                | 54.4 ± 15.3                 | 0.71 ± 0.07                    |
| Hydr 4%   | 3.08 ± 0.49                 | 0.155 ± 0.054             | 3.08 ± 0.49                 | 0.05 ± 0.01                    | 14.4 ± 1.4                  | 12.3 ± 1.3                | 18.9 ± 1.9                  | 0.86 ± 0.03                    |

Table S6: Numerical values of Figure 4, mechanical properties of hydrogels consisting of polymers with a different incorporation ratio determined by rheology

### Frequency and strain sweep Hydr2%

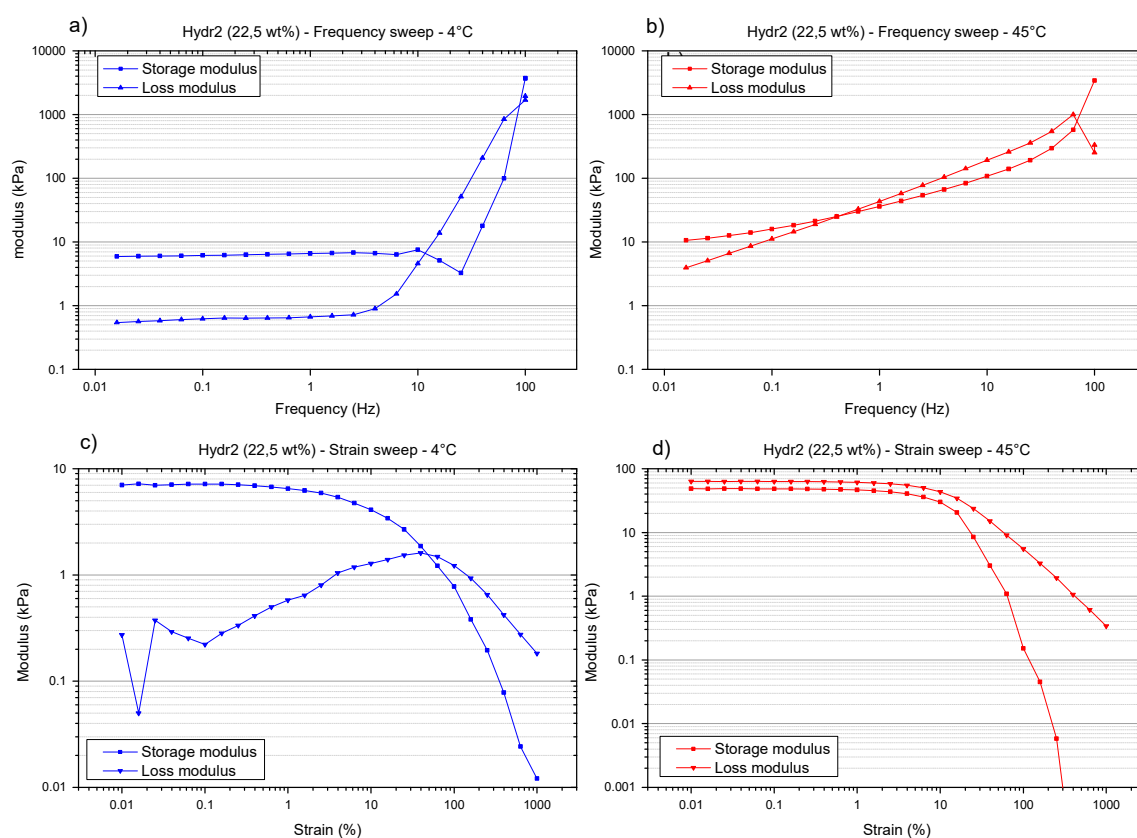

Fig.S5: Frequency and strain sweep for Hydr2% at 4°C and 45°C; Frequency and strain sweep for Hydr2% at 4°C (blue) and 45°C (red), a) frequency sweep at 4°C, b) frequency sweep at 45 °C, c) strain sweep at 4 °C, d) strain sweep at 45 °C



| <i>Cold 4 °C</i> |                                      |                                         | <i>Hot 45 °C</i>                     |                                         |
|------------------|--------------------------------------|-----------------------------------------|--------------------------------------|-----------------------------------------|
| <i>Name</i>      | <b>young's<br/>modulus<br/>(kPa)</b> | <b>Relaxation<br/>modulus<br/>(kPa)</b> | <b>young's<br/>modulus<br/>(kPa)</b> | <b>Relaxation<br/>modulus<br/>(kPa)</b> |
| <i>Hydr 2%</i>   | 9.86 ± 1.56                          | 5.98 ± 1.41                             | 94.5 ± 30.6                          | 6.12 ± 1.14                             |
| <i>Hydr 3%</i>   | 21.7 ± 4.3                           | 12.6 ± 3.4                              | 181.1 ± 31.7                         | 55.4 ± 26.1                             |

Table S7: Numerical values of Figure 9, mechanical properties of hydrogels consisting of polymers with a different incorporation ratio determined by rheology;

Compression – relaxation: data

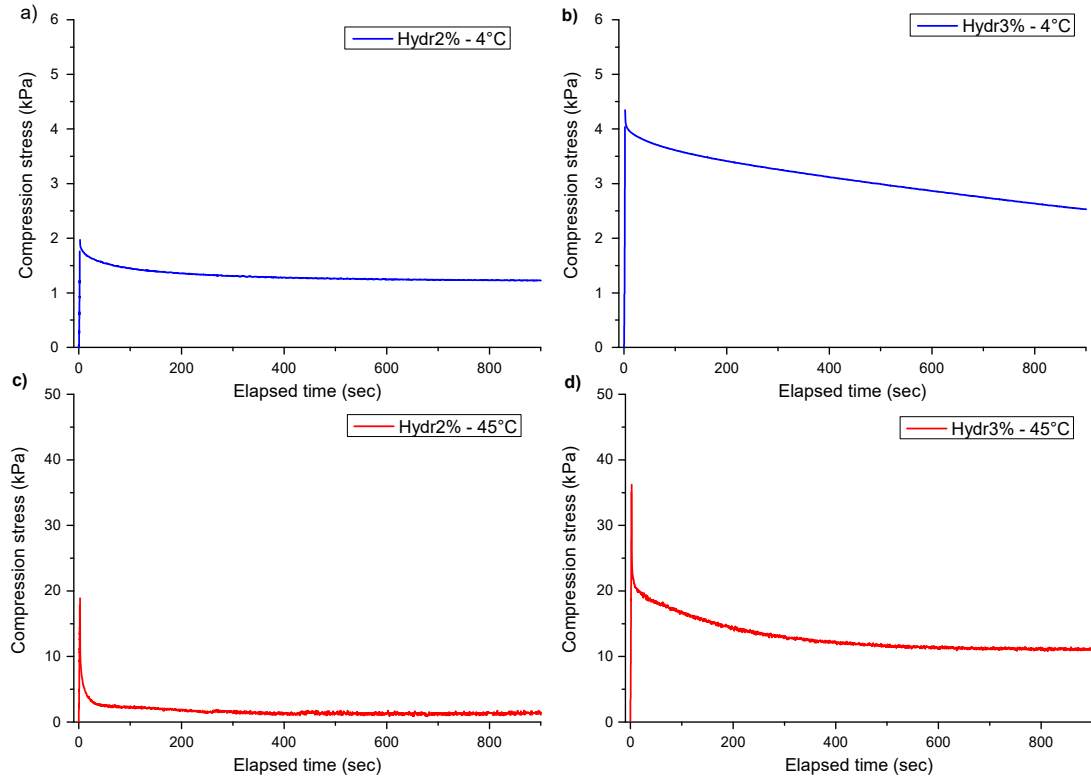

Fig.S6: Compression-relaxation test of hydr2% and hydr3% at 4 °C and 45 °C; a) hydr2% at 4 °C, b) hydr3% at 4 °C, c) hydr2% at 45 °C, d) hydr3% at 45 °C
